# Supplementary material for: Patterns of natural selection acting on the mitochondrial genome of a locally adapted fish species
Source: Genet Sel Evol. 2015 Jul 3;47(1):58. doi: 10.1186/s12711-015-0138-0 (PMC4490732; doi:10.1186/s12711-015-0138-0)
Supplement: Additional file 2: Figure S1. — Phylogenetic tree of the partial mtDNA sequences constructed with PHYLIP using 1000 iterations. Phylogenetic tree of partial mitochondrial DNA sequences from Atlantic salmon across Europe. [file 12711_2015_138_MOESM2_ESM.pdf]

## Sheet: Table S1
Table S1. Sample size (N) and number of individuals with SNP per river.
River		N	SNP position
			00711:T/C	00750:C/T	00886:A/G	00901:G/A	00921:G/A	00942:G/A	00943:C/A	00954:G/A	000968:A/-	00969:G/C	00970:T/A	00971:C/G	00972:A/T	00973:C/A	00974:T/A	00976:G/A	01029:A/G	03878:C/T	03900:G/A	03926:C/T	03938:A/G	03971:G/A	03989:A/G	04079:C/T	04082:T/C	04118:G/A	04130:G/A	04424:C/T	04517:G/A	04565:G/A	04568:C/T	04578:G/A	04718:C/T	04728:G/A	04751:G/A	04772:A/G	04781:A/G	04821:G/A	04822:C/T	04910:A/G	05161:A/G	05179:C/T	05290:A/G	05312:C/T	05341:T/C	05365:C/T	05380:A/G
Ason	AS	12	0	0	1	0	0	12	12	0	0	0	0	0	0	0	0	0	0	0	0	0	0	0	4	0	0	0	0	0	0	0	0	0	0	0	0	0	0	0	0	0	0	0	0	0	0	4	0
Allier	AG	12	0	0	0	0	0	12	12	0	0	0	0	0	0	0	0	0	0	0	0	0	4	0	9	0	0	0	4	0	5	0	0	0	0	0	0	0	0	7	0	0	0	4	0	0	4	0	0
Elorn	EL	12	0	0	0	0	0	12	12	0	0	0	0	0	0	0	0	0	0	0	0	0	0	0	11	0	0	0	0	0	8	0	0	0	0	0	0	5	0	1	0	7	0	0	0	0	0	2	0
Teign	TE	6	0	0	0	0	0	6	6	0	0	0	0	0	0	0	0	0	0	0	0	0	0	0	4	0	0	0	1	0	2	0	0	0	1	1	0	2	0	1	0	2	0	1	0	0	1	0	0
Taw	TA	12	0	0	0	0	0	6	6	0	0	0	0	0	0	0	0	0	0	0	0	0	0	0	4	0	0	0	0	0	2	0	0	0	0	0	0	0	0	1	0	1	0	0	0	0	0	2	0
Blackwater	BV	12	0	0	0	0	0	12	12	0	0	0	0	0	0	0	0	0	0	0	0	0	0	0	9	0	0	0	0	0	6	0	0	0	0	0	0	1	0	2	0	0	0	0	0	0	0	2	0
Conwy	CW	12	0	0	0	0	0	12	12	0	0	0	0	0	0	0	0	0	0	0	1	0	0	0	9	0	0	0	0	0	4	0	0	0	0	0	0	0	0	0	0	0	0	0	0	0	0	5	0
Dacre Beck	DB	12	0	0	0	0	0	12	12	0	0	0	0	0	0	0	0	0	0	0	0	0	0	0	11	0	0	0	0	0	6	0	0	0	0	0	0	0	0	0	0	0	0	0	0	0	0	5	0
Stinchar	ST	12	0	0	0	0	0	12	12	0	0	0	0	0	0	0	0	0	0	0	0	0	0	0	7	0	0	0	0	0	8	0	0	2	0	0	0	0	0	0	0	3	0	0	0	0	0	3	0
Feochan	F	12	0	0	0	0	0	12	12	0	0	0	0	0	0	0	0	1	0	1	0	0	0	0	7	0	0	0	0	0	2	0	0	0	0	0	0	0	0	3	0	0	0	0	0	0	0	5	0
Orchy	OR	12	0	0	0	0	0	12	12	0	3	0	0	0	0	0	0	0	3	0	0	0	0	0	9	0	0	0	0	0	6	0	0	0	0	0	0	0	0	0	0	3	0	0	0	0	0	3	0
Laxford	LX	12	0	0	0	0	0	12	12	2	0	0	0	0	0	0	0	1	0	0	0	0	0	0	5	0	0	0	0	0	1	0	0	0	0	0	0	0	0	7	0	0	0	0	0	0	0	4	0
North Uist	NU	12	0	0	0	0	0	12	12	0	1	0	0	0	0	0	0	0	1	0	0	0	0	0	4	0	0	0	0	0	0	1	0	0	0	0	0	0	0	0	0	0	0	0	0	0	0	4	0
Oykel	OY	12	0	0	0	0	0	12	12	0	0	0	0	0	0	0	0	0	0	0	0	0	0	0	7	0	0	0	0	0	4	0	0	0	0	0	0	0	0	1	0	0	0	0	0	0	0	4	0
Ugie	UF	10	0	0	0	0	0	10	10	0	0	0	0	0	0	0	0	0	0	0	0	0	0	0	8	0	0	0	0	0	2	0	0	0	0	0	0	0	0	3	0	0	0	0	1	0	0	6	0
North Esk	NE	12	0	0	1	0	0	12	12	0	0	0	0	0	0	0	0	0	0	0	0	1	0	0	9	0	0	2	0	0	5	0	0	1	0	0	0	0	0	0	0	3	0	0	1	1	0	2	1
Tweed	TW	12	0	0	0	0	0	12	12	0	0	0	0	0	0	0	0	1	0	0	0	0	0	0	8	0	0	0	0	0	4	0	0	0	0	0	0	0	0	2	0	3	0	0	1	0	0	3	0
Hofsa	HF	12	0	0	0	0	0	12	12	0	0	0	0	0	0	0	0	0	0	0	0	0	0	0	8	0	0	0	0	0	8	0	0	0	0	0	0	0	0	0	0	5	0	0	0	0	0	1	0
Sog	SG	12	0	0	0	0	4	12	12	0	0	0	0	0	0	0	0	0	0	0	0	0	0	0	0	0	0	0	0	0	0	0	0	1	0	0	0	0	0	0	0	0	0	0	0	0	0	0	0
Bjerkreimselva	BJ	11	0	0	0	0	5	11	11	0	0	0	0	0	0	0	0	0	0	0	0	0	0	0	3	0	0	0	0	0	0	0	0	0	0	0	0	0	0	0	0	0	0	0	0	0	0	3	0
Numedalslagen	NU	12	0	0	0	2	0	12	12	0	0	0	0	0	0	2	0	0	0	0	1	0	0	0	8	0	0	0	0	0	7	0	0	2	0	0	0	0	0	1	0	1	0	0	0	0	0	1	0
Eirvassdraget	ER	12	0	0	0	0	0	12	12	0	0	0	0	0	0	0	0	0	0	0	0	0	0	0	6	0	0	0	0	0	5	0	0	1	0	0	0	0	0	4	0	3	0	0	0	0	0	1	0
Komagelva	KO	11	0	0	0	0	0	11	11	0	0	0	0	0	0	0	0	0	0	0	0	5	0	0	6	0	0	0	0	0	1	0	0	0	0	0	0	0	0	1	4	0	0	0	5	5	0	0	5
Neva	NE	12	0	4	0	0	0	12	12	0	0	0	0	0	0	0	0	0	0	0	0	0	0	0	12	0	0	0	0	0	12	0	0	0	0	0	0	0	0	0	0	0	0	0	0	0	0	0	0
Namsen	NA	12	0	0	0	2	0	12	12	0	0	0	0	0	0	2	0	0	0	0	0	0	0	0	6	0	0	0	0	0	4	0	0	1	0	0	0	0	0	5	0	1	0	0	0	0	0	3	0
Rynda	RY	12	3	0	0	0	0	12	9	0	0	3	3	3	3	0	3	3	0	1	0	1	0	3	9	3	3	0	0	3	3	3	3	0	0	0	3	0	3	3	1	1	1	0	1	1	0	2	1
Pongoma	PG	12	0	0	0	0	0	12	12	0	0	0	0	0	0	0	0	0	0	0	0	0	0	0	6	0	0	0	0	0	6	0	0	0	0	0	0	0	0	1	0	0	0	0	0	0	0	0	0
Pechora	PE	12	0	0	0	0	0	12	12	0	0	0	0	0	0	0	0	0	0	0	0	0	0	0	12	0	0	0	0	0	12	0	0	0	0	0	0	0	0	0	0	0	0	0	0	0	0	0	0
Teno	TN	12	2	0	0	0	0	12	10	0	0	2	2	2	2	0	2	2	0	1	0	0	0	2	9	2	2	0	0	2	2	2	2	0	0	0	2	0	2	2	0	0	2	0	0	0	0	5	0
[truncated: 126 more columns]

## Sheet: Table S2
Table S2. SNP location in relation to reference genome NC_001960.1
	D Loop
	1	2	3	4	5	6	7	8	9	10	11	12	13	14	15	16	17	18	19	20	21	22	23	24	25	26	27	28	29	30	31	32	33	34	35	36	37	38	39	40	41	42	43	44	45	46	47	48	49
	654	655	656	657	658	659	660	661	662	663	664	665	666	667	668	669	670	671	672	673	674	675	676	677	678	679	680	681	682	683	684	685	686	687	688	689	690	691	692	693	694	695	696	697	698	699	700	701	702
	A	A	G	A	T	A	T	T	C	T	A	T	A	A	A	G	A	A	T	C	A	C	A	T	A	C	T	T	G	G	A	T	A	T	C	A	A	G	T	G	C	A	T	A	A	G	G	T	T
AS302	A	A	G	A	T	A	T	T	C	T	A	T	A	A	A	G	A	A	T	C	A	C	A	T	A	C	T	T	G	G	A	T	A	T	C	A	A	G	T	G	C	A	T	A	A	G	G	T	T
AS303	A	A	G	A	T	A	T	T	C	T	A	T	A	A	A	G	A	A	T	C	A	C	A	T	A	C	T	T	G	G	A	T	A	T	C	A	A	G	T	G	C	A	T	A	A	G	G	T	T
AS304	A	A	G	A	T	A	T	T	C	T	A	T	A	A	A	G	A	A	T	C	A	C	A	T	A	C	T	T	G	G	A	T	A	T	C	A	A	G	T	G	C	A	T	A	A	G	G	T	T
AS305	A	A	G	A	T	A	T	T	C	T	A	T	A	A	A	G	A	A	T	C	A	C	A	T	A	C	T	T	G	G	A	T	A	T	C	A	A	G	T	G	C	A	T	A	A	G	G	T	T
AS306	A	A	G	A	T	A	T	T	C	T	A	T	A	A	A	G	A	A	T	C	A	C	A	T	A	C	T	T	G	G	A	T	A	T	C	A	A	G	T	G	C	A	T	A	A	G	G	T	T
AS307	A	A	G	A	T	A	T	T	C	T	A	T	A	A	A	G	A	A	T	C	A	C	A	T	A	C	T	T	G	G	A	T	A	T	C	A	A	G	T	G	C	A	T	A	A	G	G	T	T
AS325	A	A	G	A	T	A	T	T	C	T	A	T	A	A	A	G	A	A	T	C	A	C	A	T	A	C	T	T	G	G	A	T	A	T	C	A	A	G	T	G	C	A	T	A	A	G	G	T	T
AS326	A	A	G	A	T	A	T	T	C	T	A	T	A	A	A	G	A	A	T	C	A	C	A	T	A	C	T	T	G	G	A	T	A	T	C	A	A	G	T	G	C	A	T	A	A	G	G	T	T
AS327	A	A	G	A	T	A	T	T	C	T	A	T	A	A	A	G	A	A	T	C	A	C	A	T	A	C	T	T	G	G	A	T	A	T	C	A	A	G	T	G	C	A	T	A	A	G	G	T	T
AS328	A	A	G	A	T	A	T	T	C	T	A	T	A	A	A	G	A	A	T	C	A	C	A	T	A	C	T	T	G	G	A	T	A	T	C	A	A	G	T	G	C	A	T	A	A	G	G	T	T
AS329	A	A	G	A	T	A	T	T	C	T	A	T	A	A	A	G	A	A	T	C	A	C	A	T	A	C	T	T	G	G	A	T	A	T	C	A	A	G	T	G	C	A	T	A	A	G	G	T	T
AS330	A	A	G	A	T	A	T	T	C	T	A	T	A	A	A	G	A	A	T	C	A	C	A	T	A	C	T	T	G	G	A	T	A	T	C	A	A	G	T	G	C	A	T	A	A	G	G	T	T
AG704	A	A	G	A	T	A	T	T	C	T	A	T	A	A	A	G	A	A	T	C	A	C	A	T	A	C	T	T	G	G	A	T	A	T	C	A	A	G	T	G	C	A	T	A	A	G	G	T	T
AG705	A	A	G	A	T	A	T	T	C	T	A	T	A	A	A	G	A	A	T	C	A	C	A	T	A	C	T	T	G	G	A	T	A	T	C	A	A	G	T	G	C	A	T	A	A	G	G	T	T
AG706	A	A	G	A	T	A	T	T	C	T	A	T	A	A	A	G	A	A	T	C	A	C	A	T	A	C	T	T	G	G	A	T	A	T	C	A	A	G	T	G	C	A	T	A	A	G	G	T	T
AG707	A	A	G	A	T	A	T	T	C	T	A	T	A	A	A	G	A	A	T	C	A	C	A	T	A	C	T	T	G	G	A	T	A	T	C	A	A	G	T	G	C	A	T	A	A	G	G	T	T
AG710	A	A	G	A	T	A	T	T	C	T	A	T	A	A	A	G	A	A	T	C	A	C	A	T	A	C	T	T	G	G	A	T	A	T	C	A	A	G	T	G	C	A	T	A	A	G	G	T	T
AG794	A	A	G	A	T	A	T	T	C	T	A	T	A	A	A	G	A	A	T	C	A	C	A	T	A	C	T	T	G	G	A	T	A	T	C	A	A	G	T	G	C	A	T	A	A	G	G	T	T
AG800	A	A	G	A	T	A	T	T	C	T	A	T	A	A	A	G	A	A	T	C	A	C	A	T	A	C	T	T	G	G	A	T	A	T	C	A	A	G	T	G	C	A	T	A	A	G	G	T	T
AG892	A	A	G	A	T	A	T	T	C	T	A	T	A	A	A	G	A	A	T	C	A	C	A	T	A	C	T	T	G	G	A	T	A	T	C	A	A	G	T	G	C	A	T	A	A	G	G	T	T
AG893	A	A	G	A	T	A	T	T	C	T	A	T	A	A	A	G	A	A	T	C	A	C	A	T	A	C	T	T	G	G	A	T	A	T	C	A	A	G	T	G	C	A	T	A	A	G	G	T	T
AG895	A	A	G	A	T	A	T	T	C	T	A	T	A	A	A	G	A	A	T	C	A	C	A	T	A	C	T	T	G	G	A	T	A	T	C	A	A	G	T	G	C	A	T	A	A	G	G	T	T
AG1803	A	A	G	A	T	A	T	T	C	T	A	T	A	A	A	G	A	A	T	C	A	C	A	T	A	C	T	T	G	G	A	T	A	T	C	A	A	G	T	G	C	A	T	A	A	G	G	T	T
AG1804	A	A	G	A	T	A	T	T	C	T	A	T	A	A	A	G	A	A	T	C	A	C	A	T	A	C	T	T	G	G	A	T	A	T	C	A	A	G	T	G	C	A	T	A	A	G	G	T	T
EL01	A	A	G	A	T	A	T	T	C	T	A	T	A	A	A	G	A	A	T	C	A	C	A	T	A	C	T	T	G	G	A	T	A	T	C	A	A	G	T	G	C	A	T	A	A	G	G	T	T
EL02	A	A	G	A	T	A	T	T	C	T	A	T	A	A	A	G	A	A	T	C	A	C	A	T	A	C	T	T	G	G	A	T	A	T	C	A	A	G	T	G	C	A	T	A	A	G	G	T	T
EL03	A	A	G	A	T	A	T	T	C	T	A	T	A	A	A	G	A	A	T	C	A	C	A	T	A	C	T	T	G	G	A	T	A	T	C	A	A	G	T	G	C	A	T	A	A	G	G	T	T
EL04	A	A	G	A	T	A	T	T	C	T	A	T	A	A	A	G	A	A	T	C	A	C	A	T	A	C	T	T	G	G	A	T	A	T	C	A	A	G	T	G	C	A	T	A	A	G	G	T	T
EL05	A	A	G	A	T	A	T	T	C	T	A	T	A	A	A	G	A	A	T	C	A	C	A	T	A	C	T	T	G	G	A	T	A	T	C	A	A	G	T	G	C	A	T	A	A	G	G	T	T
EL06	A	A	G	A	T	A	T	T	C	T	A	T	A	A	A	G	A	A	T	C	A	C	A	T	A	C	T	T	G	G	A	T	A	T	C	A	A	G	T	G	C	A	T	A	A	G	G	T	T
EL07	A	A	G	A	T	A	T	T	C	T	A	T	A	A	A	G	A	A	T	C	A	C	A	T	A	C	T	T	G	G	A	T	A	T	C	A	A	G	T	G	C	A	T	A	A	G	G	T	T
EL08	A	A	G	A	T	A	T	T	C	T	A	T	A	A	A	G	A	A	T	C	A	C	A	T	A	C	T	T	G	G	A	T	A	T	C	A	A	G	T	G	C	A	T	A	A	G	G	T	T
EL09	A	A	G	A	T	A	T	T	C	T	A	T	A	A	A	G	A	A	T	C	A	C	A	T	A	C	T	T	G	G	A	T	A	T	C	A	A	G	T	G	C	A	T	A	A	G	G	T	T
EL10	A	A	G	A	T	A	T	T	C	T	A	T	A	A	A	G	A	A	T	C	A	C	A	T	A	C	T	T	G	G	A	T	A	T	C	A	A	G	T	G	C	A	T	A	A	G	G	T	T
EL11	A	A	G	A	T	A	T	T	C	T	A	T	A	A	A	G	A	A	T	C	A	C	A	T	A	C	T	T	G	G	A	T	A	T	C	A	A	G	T	G	C	A	T	A	A	G	G	T	T
EL12	A	A	G	A	T	A	T	T	C	T	A	T	A	A	A	G	A	A	T	C	A	C	A	T	A	C	T	T	G	G	A	T	A	T	C	A	A	G	T	G	C	A	T	A	A	G	G	T	T
TE01	A	A	G	A	T	A	T	T	C	T	A	T	A	A	A	G	A	A	T	C	A	C	A	T	A	C	T	T	G	G	A	T	A	T	C	A	A	G	T	G	C	A	T	A	A	G	G	T	T
TE02	A	A	G	A	T	A	T	T	C	T	A	T	A	A	A	G	A	A	T	C	A	C	A	T	A	C	T	T	G	G	A	T	A	T	C	A	A	G	T	G	C	A	T	A	A	G	G	T	T
TE04	A	A	G	A	T	A	T	T	C	T	A	T	A	A	A	G	A	A	T	C	A	C	A	T	A	C	T	T	G	G	A	T	A	T	C	A	A	G	T	G	C	A	T	A	A	G	G	T	T
TE06	A	A	G	A	T	A	T	T	C	T	A	T	A	A	A	G	A	A	T	C	A	C	A	T	A	C	T	T	G	G	A	T	A	T	C	A	A	G	T	G	C	A	T	A	A	G	G	T	T
TE09	A	A	G	A	T	A	T	T	C	T	A	T	A	A	A	G	A	A	T	C	A	C	A	T	A	C	T	T	G	G	A	T	A	T	C	A	A	G	T	G	C	A	T	A	A	G	G	T	T
TE10	A	A	G	A	T	A	T	T	C	T	A	T	A	A	A	G	A	A	T	C	A	C	A	T	A	C	T	T	G	G	A	T	A	T	C	A	A	G	T	G	C	A	T	A	A	G	G	T	T
TA65	A	A	G	A	T	A	T	T	C	T	A	T	A	A	A	G	A	A	T	C	A	C	A	T	A	C	T	T	G	G	A	T	A	T	C	A	A	G	T	G	C	A	T	A	A	G	G	T	T
TA66	A	A	G	A	T	A	T	T	C	T	A	T	A	A	A	G	A	A	T	C	A	C	A	T	A	C	T	T	G	G	A	T	A	T	C	A	A	G	T	G	C	A	T	A	A	G	G	T	T
TA68	A	A	G	A	T	A	T	T	C	T	A	T	A	A	A	G	A	A	T	C	A	C	A	T	A	C	T	T	G	G	A	T	A	T	C	A	A	G	T	G	C	A	T	A	A	G	G	T	T
TA69	A	A	G	A	T	A	T	T	C	T	A	T	A	A	A	G	A	A	T	C	A	C	A	T	A	C	T	T	G	G	A	T	A	T	C	A	A	G	T	G	C	A	T	A	A	G	G	T	T
TA70	A	A	G	A	T	A	T	T	C	T	A	T	A	A	A	G	A	A	T	C	A	C	A	T	A	C	T	T	G	G	A	T	A	T	C	A	A	G	T	G	C	A	T	A	A	G	G	T	T
TA76	A	A	G	A	T	A	T	T	C	T	A	T	A	A	A	G	A	A	T	C	A	C	A	T	A	C	T	T	G	G	A	T	A	T	C	A	A	G	T	G	C	A	T	A	A	G	G	T	T
BV106	A	A	G	A	T	A	T	T	C	T	A	T	A	A	A	G	A	A	T	C	A	C	A	T	A	C	T	T	G	G	A	T	A	T	C	A	A	G	T	G	C	A	T	A	A	G	G	T	T
BV107	A	A	G	A	T	A	T	T	C	T	A	T	A	A	A	G	A	A	T	C	A	C	A	T	A	C	T	T	G	G	A	T	A	T	C	A	A	G	T	G	C	A	T	A	A	G	G	T	T
BV110	A	A	G	A	T	A	T	T	C	T	A	T	A	A	A	G	A	A	T	C	A	C	A	T	A	C	T	T	G	G	A	T	A	T	C	A	A	G	T	G	C	A	T	A	A	G	G	T	T
BV111	A	A	G	A	T	A	T	T	C	T	A	T	A	A	A	G	A	A	T	C	A	C	A	T	A	C	T	T	G	G	A	T	A	T	C	A	A	G	T	G	C	A	T	A	A	G	G	T	T
BV112	A	A	G	A	T	A	T	T	C	T	A	T	A	A	A	G	A	A	T	C	A	C	A	T	A	C	T	T	G	G	A	T	A	T	C	A	A	G	T	G	C	A	T	A	A	G	G	T	T
BV115	A	A	G	A	T	A	T	T	C	T	A	T	A	A	A	G	A	A	T	C	A	C	A	T	A	C	T	T	G	G	A	T	A	T	C	A	A	G	T	G	C	A	T	A	A	G	G	T	T
BV117	A	A	G	A	T	A	T	T	C	T	A	T	A	A	A	G	A	A	T	C	A	C	A	T	A	C	T	T	G	G	A	T	A	T	C	A	A	G	T	G	C	A	T	A	A	G	G	T	T
BV119	A	A	G	A	T	A	T	T	C	T	A	T	A	A	A	G	A	A	T	C	A	C	A	T	A	C	T	T	G	G	A	T	A	T	C	A	A	G	T	G	C	A	T	A	A	G	G	T	T
BV122	A	A	G	A	T	A	T	T	C	T	A	T	A	A	A	G	A	A	T	C	A	C	A	T	A	C	T	T	G	G	A	T	A	T	C	A	A	G	T	G	C	A	T	A	A	G	G	T	T
BV123	A	A	G	A	T	A	T	T	C	T	A	T	A	A	A	G	A	A	T	C	A	C	A	T	A	C	T	T	G	G	A	T	A	T	C	A	A	G	T	G	C	A	T	A	A	G	G	T	T
BV125	A	A	G	A	T	A	T	T	C	T	A	T	A	A	A	G	A	A	T	C	A	C	A	T	A	C	T	T	G	G	A	T	A	T	C	A	A	G	T	G	C	A	T	A	A	G	G	T	T
BV131	A	A	G	A	T	A	T	T	C	T	A	T	A	A	A	G	A	A	T	C	A	C	A	T	A	C	T	T	G	G	A	T	A	T	C	A	A	G	T	G	C	A	T	A	A	G	G	T	T
CW01	A	A	G	A	T	A	T	T	C	T	A	T	A	A	A	G	A	A	T	C	A	C	A	T	A	C	T	T	G	G	A	T	A	T	C	A	A	G	T	G	C	A	T	A	A	G	G	T	T
CW03	A	A	G	A	T	A	T	T	C	T	A	T	A	A	A	G	A	A	T	C	A	C	A	T	A	C	T	T	G	G	A	T	A	T	C	A	A	G	T	G	C	A	T	A	A	G	G	T	T
CW04	A	A	G	A	T	A	T	T	C	T	A	T	A	A	A	G	A	A	T	C	A	C	A	T	A	C	T	T	G	G	A	T	A	T	C	A	A	G	T	G	C	A	T	A	A	G	G	T	T
CW07	A	A	G	A	T	A	T	T	C	T	A	T	A	A	A	G	A	A	T	C	A	C	A	T	A	C	T	T	G	G	A	T	A	T	C	A	A	G	T	G	C	A	T	A	A	G	G	T	T
CW08	A	A	G	A	T	A	T	T	C	T	A	T	A	A	A	G	A	A	T	C	A	C	A	T	A	C	T	T	G	G	A	T	A	T	C	A	A	G	T	G	C	A	T	A	A	G	G	T	T
CW09	A	A	G	A	T	A	T	T	C	T	A	T	A	A	A	G	A	A	T	C	A	C	A	T	A	C	T	T	G	G	A	T	A	T	C	A	A	G	T	G	C	A	T	A	A	G	G	T	T
CW10	A	A	G	A	T	A	T	T	C	T	A	T	A	A	A	G	A	A	T	C	A	C	A	T	A	C	T	T	G	G	A	T	A	T	C	A	A	G	T	G	C	A	T	A	A	G	G	T	T
CW11	A	A	G	A	T	A	T	T	C	T	A	T	A	A	A	G	A	A	T	C	A	C	A	T	A	C	T	T	G	G	A	T	A	T	C	A	A	G	T	G	C	A	T	A	A	G	G	T	T
CW12	A	A	G	A	T	A	T	T	C	T	A	T	A	A	A	G	A	A	T	C	A	C	A	T	A	C	T	T	G	G	A	T	A	T	C	A	A	G	T	G	C	A	T	A	A	G	G	T	T
CW13	A	A	G	A	T	A	T	T	C	T	A	T	A	A	A	G	A	A	T	C	A	C	A	T	A	C	T	T	G	G	A	T	A	T	C	A	A	G	T	G	C	A	T	A	A	G	G	T	T
CW26	A	A	G	A	T	A	T	T	C	T	A	T	A	A	A	G	A	A	T	C	A	C	A	T	A	C	T	T	G	G	A	T	A	T	C	A	A	G	T	G	C	A	T	A	A	G	G	T	T
CW31	A	A	G	A	T	A	T	T	C	T	A	T	A	A	A	G	A	A	T	C	A	C	A	T	A	C	T	T	G	G	A	T	A	T	C	A	A	G	T	G	C	A	T	A	A	G	G	T	T
DB1901	A	A	G	A	T	A	T	T	C	T	A	T	A	A	A	G	A	A	T	C	A	C	A	T	A	C	T	T	G	G	A	T	A	T	C	A	A	G	T	G	C	A	T	A	A	G	G	T	T
DB1902	A	A	G	A	T	A	T	T	C	T	A	T	A	A	A	G	A	A	T	C	A	C	A	T	A	C	T	T	G	G	A	T	A	T	C	A	A	G	T	G	C	A	T	A	A	G	G	T	T
DB1904	A	A	G	A	T	A	T	T	C	T	A	T	A	A	A	G	A	A	T	C	A	C	A	T	A	C	T	T	G	G	A	T	A	T	C	A	A	G	T	G	C	A	T	A	A	G	G	T	T
DB1906	A	A	G	A	T	A	T	T	C	T	A	T	A	A	A	G	A	A	T	C	A	C	A	T	A	C	T	T	G	G	A	T	A	T	C	A	A	G	T	G	C	A	T	A	A	G	G	T	T
DB1908	A	A	G	A	T	A	T	T	C	T	A	T	A	A	A	G	A	A	T	C	A	C	A	T	A	C	T	T	G	G	A	T	A	T	C	A	A	G	T	G	C	A	T	A	A	G	G	T	T
DB1911	A	A	G	A	T	A	T	T	C	T	A	T	A	A	A	G	A	A	T	C	A	C	A	T	A	C	T	T	G	G	A	T	A	T	C	A	A	G	T	G	C	A	T	A	A	G	G	T	T
DB1914	A	A	G	A	T	A	T	T	C	T	A	T	A	A	A	G	A	A	T	C	A	C	A	T	A	C	T	T	G	G	A	T	A	T	C	A	A	G	T	G	C	A	T	A	A	G	G	T	T
DB1915	A	A	G	A	T	A	T	T	C	T	A	T	A	A	A	G	A	A	T	C	A	C	A	T	A	C	T	T	G	G	A	T	A	T	C	A	A	G	T	G	C	A	T	A	A	G	G	T	T
DB1918	A	A	G	A	T	A	T	T	C	T	A	T	A	A	A	G	A	A	T	C	A	C	A	T	A	C	T	T	G	G	A	T	A	T	C	A	A	G	T	G	C	A	T	A	A	G	G	T	T
DB1920	A	A	G	A	T	A	T	T	C	T	A	T	A	A	A	G	A	A	T	C	A	C	A	T	A	C	T	T	G	G	A	T	A	T	C	A	A	G	T	G	C	A	T	A	A	G	G	T	T
DB1922	A	A	G	A	T	A	T	T	C	T	A	T	A	A	A	G	A	A	T	C	A	C	A	T	A	C	T	T	G	G	A	T	A	T	C	A	A	G	T	G	C	A	T	A	A	G	G	T	T
DB1927	A	A	G	A	T	A	T	T	C	T	A	T	A	A	A	G	A	A	T	C	A	C	A	T	A	C	T	T	G	G	A	T	A	T	C	A	A	G	T	G	C	A	T	A	A	G	G	T	T
ST451	A	A	G	A	T	A	T	T	C	T	A	T	A	A	A	G	A	A	T	C	A	C	A	T	A	C	T	T	G	G	A	T	A	T	C	A	A	G	T	G	C	A	T	A	A	G	G	T	T
ST452	A	A	G	A	T	A	T	T	C	T	A	T	A	A	A	G	A	A	T	C	A	C	A	T	A	C	T	T	G	G	A	T	A	T	C	A	A	G	T	G	C	A	T	A	A	G	G	T	T
ST453	A	A	G	A	T	A	T	T	C	T	A	T	A	A	A	G	A	A	T	C	A	C	A	T	A	C	T	T	G	G	A	T	A	T	C	A	A	G	T	G	C	A	T	A	A	G	G	T	T
ST456	A	A	G	A	T	A	T	T	C	T	A	T	A	A	A	G	A	A	T	C	A	C	A	T	A	C	T	T	G	G	A	T	A	T	C	A	A	G	T	G	C	A	T	A	A	G	G	T	T
ST457	A	A	G	A	T	A	T	T	C	T	A	T	A	A	A	G	A	A	T	C	A	C	A	T	A	C	T	T	G	G	A	T	A	T	C	A	A	G	T	G	C	A	T	A	A	G	G	T	T
ST458	A	A	G	A	T	A	T	T	C	T	A	T	A	A	A	G	A	A	T	C	A	C	A	T	A	C	T	T	G	G	A	T	A	T	C	A	A	G	T	G	C	A	T	A	A	G	G	T	T
ST460	A	A	G	A	T	A	T	T	C	T	A	T	A	A	A	G	A	A	T	C	A	C	A	T	A	C	T	T	G	G	A	T	A	T	C	A	A	G	T	G	C	A	T	A	A	G	G	T	T
ST462	A	A	G	A	T	A	T	T	C	T	A	T	A	A	A	G	A	A	T	C	A	C	A	T	A	C	T	T	G	G	A	T	A	T	C	A	A	G	T	G	C	A	T	A	A	G	G	T	T
ST463	A	A	G	A	T	A	T	T	C	T	A	T	A	A	A	G	A	A	T	C	A	C	A	T	A	C	T	T	G	G	A	T	A	T	C	A	A	G	T	G	C	A	T	A	A	G	G	T	T
ST471	A	A	G	A	T	A	T	T	C	T	A	T	A	A	A	G	A	A	T	C	A	C	A	T	A	C	T	T	G	G	A	T	A	T	C	A	A	G	T	G	C	A	T	A	A	G	G	T	T
ST473	A	A	G	A	T	A	T	T	C	T	A	T	A	A	A	G	A	A	T	C	A	C	A	T	A	C	T	T	G	G	A	T	A	T	C	A	A	G	T	G	C	A	T	A	A	G	G	T	T
ST545	A	A	G	A	T	A	T	T	C	T	A	T	A	A	A	G	A	A	T	C	A	C	A	T	A	C	T	T	G	G	A	T	A	T	C	A	A	G	T	G	C	A	T	A	A	G	G	T	T
F701	A	A	G	A	T	A	T	T	C	T	A	T	A	A	A	G	A	A	T	C	A	C	A	T	A	C	T	T	G	G	A	T	A	T	C	A	A	G	T	G	C	A	T	A	A	G	G	T	T
F702	A	A	G	A	T	A	T	T	C	T	A	T	A	A	A	G	A	A	T	C	A	C	A	T	A	C	T	T	G	G	A	T	A	T	C	A	A	G	T	G	C	A	T	A	A	G	G	T	T
F703	A	A	G	A	T	A	T	T	C	T	A	T	A	A	A	G	A	A	T	C	A	C	A	T	A	C	T	T	G	G	A	T	A	T	C	A	A	G	T	G	C	A	T	A	A	G	G	T	T
F704	A	A	G	A	T	A	T	T	C	T	A	T	A	A	A	G	A	A	T	C	A	C	A	T	A	C	T	T	G	G	A	T	A	T	C	A	A	G	T	G	C	A	T	A	A	G	G	T	T
F705	A	A	G	A	T	A	T	T	C	T	A	T	A	A	A	G	A	A	T	C	A	C	A	T	A	C	T	T	G	G	A	T	A	T	C	A	A	G	T	G	C	A	T	A	A	G	G	T	T
F706	A	A	G	A	T	A	T	T	C	T	A	T	A	A	A	G	A	A	T	C	A	C	A	T	A	C	T	T	G	G	A	T	A	T	C	A	A	G	T	G	C	A	T	A	A	G	G	T	T
F707	A	A	G	A	T	A	T	T	C	T	A	T	A	A	A	G	A	A	T	C	A	C	A	T	A	C	T	T	G	G	A	T	A	T	C	A	A	G	T	G	C	A	T	A	A	G	G	T	T
F708	A	A	G	A	T	A	T	T	C	T	A	T	A	A	A	G	A	A	T	C	A	C	A	T	A	C	T	T	G	G	A	T	A	T	C	A	A	G	T	G	C	A	T	A	A	G	G	T	T
F709	A	A	G	A	T	A	T	T	C	T	A	T	A	A	A	G	A	A	T	C	A	C	A	T	A	C	T	T	G	G	A	T	A	T	C	A	A	G	T	G	C	A	T	A	A	G	G	T	T
F710	A	A	G	A	T	A	T	T	C	T	A	T	A	A	A	G	A	A	T	C	A	C	A	T	A	C	T	T	G	G	A	T	A	T	C	A	A	G	T	G	C	A	T	A	A	G	G	T	T
F711	A	A	G	A	T	A	T	T	C	T	A	T	A	A	A	G	A	A	T	C	A	C	A	T	A	C	T	T	G	G	A	T	A	T	C	A	A	G	T	G	C	A	T	A	A	G	G	T	T
F712	A	A	G	A	T	A	T	T	C	T	A	T	A	A	A	G	A	A	T	C	A	C	A	T	A	C	T	T	G	G	A	T	A	T	C	A	A	G	T	G	C	A	T	A	A	G	G	T	T
OR426	A	A	G	A	T	A	T	T	C	T	A	T	A	A	A	G	A	A	T	C	A	C	A	T	A	C	T	T	G	G	A	T	A	T	C	A	A	G	T	G	C	A	T	A	A	G	G	T	T
OR427	A	A	G	A	T	A	T	T	C	T	A	T	A	A	A	G	A	A	T	C	A	C	A	T	A	C	T	T	G	G	A	T	A	T	C	A	A	G	T	G	C	A	T	A	A	G	G	T	T
OR428	A	A	G	A	T	A	T	T	C	T	A	T	A	A	A	G	A	A	T	C	A	C	A	T	A	C	T	T	G	G	A	T	A	T	C	A	A	G	T	G	C	A	T	A	A	G	G	T	T
OR432	A	A	G	A	T	A	T	T	C	T	A	T	A	A	A	G	A	A	T	C	A	C	A	T	A	C	T	T	G	G	A	T	A	T	C	A	A	G	T	G	C	A	T	A	A	G	G	T	T
OR435	A	A	G	A	T	A	T	T	C	T	A	T	A	A	A	G	A	A	T	C	A	C	A	T	A	C	T	T	G	G	A	T	A	T	C	A	A	G	T	G	C	A	T	A	A	G	G	T	T
OR442	A	A	G	A	T	A	T	T	C	T	A	T	A	A	A	G	A	A	T	C	A	C	A	T	A	C	T	T	G	G	A	T	A	T	C	A	A	G	T	G	C	A	T	A	A	G	G	T	T
OR443	A	A	G	A	T	A	T	T	C	T	A	T	A	A	A	G	A	A	T	C	A	C	A	T	A	C	T	T	G	G	A	T	A	T	C	A	A	G	T	G	C	A	T	A	A	G	G	T	T
OR446	A	A	G	A	T	A	T	T	C	T	A	T	A	A	A	G	A	A	T	C	A	C	A	T	A	C	T	T	G	G	A	T	A	T	C	A	A	G	T	G	C	A	T	A	A	G	G	T	T
OR2211	A	A	G	A	T	A	T	T	C	T	A	T	A	A	A	G	A	A	T	C	A	C	A	T	A	C	T	T	G	G	A	T	A	T	C	A	A	G	T	G	C	A	T	A	A	G	G	T	T
OR2214	A	A	G	A	T	A	T	T	C	T	A	T	A	A	A	G	A	A	T	C	A	C	A	T	A	C	T	T	G	G	A	T	A	T	C	A	A	G	T	G	C	A	T	A	A	G	G	T	T
OR2216	A	A	G	A	T	A	T	T	C	T	A	T	A	A	A	G	A	A	T	C	A	C	A	T	A	C	T	T	G	G	A	T	A	T	C	A	A	G	T	G	C	A	T	A	A	G	G	T	T
OR2218	A	A	G	A	T	A	T	T	C	T	A	T	A	A	A	G	A	A	T	C	A	C	A	T	A	C	T	T	G	G	A	T	A	T	C	A	A	G	T	G	C	A	T	A	A	G	G	T	T
LX01	A	A	G	A	T	A	T	T	C	T	A	T	A	A	A	G	A	A	T	C	A	C	A	T	A	C	T	T	G	G	A	T	A	T	C	A	A	G	T	G	C	A	T	A	A	G	G	T	T
LX02	A	A	G	A	T	A	T	T	C	T	A	T	A	A	A	G	A	A	T	C	A	C	A	T	A	C	T	T	G	G	A	T	A	T	C	A	A	G	T	G	C	A	T	A	A	G	G	T	T
LX03	A	A	G	A	T	A	T	T	C	T	A	T	A	A	A	G	A	A	T	C	A	C	A	T	A	C	T	T	G	G	A	T	A	T	C	A	A	G	T	G	C	A	T	A	A	G	G	T	T
LX04	A	A	G	A	T	A	T	T	C	T	A	T	A	A	A	G	A	A	T	C	A	C	A	T	A	C	T	T	G	G	A	T	A	T	C	A	A	G	T	G	C	A	T	A	A	G	G	T	T
LX05	A	A	G	A	T	A	T	T	C	T	A	T	A	A	A	G	A	A	T	C	A	C	A	T	A	C	T	T	G	G	A	T	A	T	C	A	A	G	T	G	C	A	T	A	A	G	G	T	T
LX06	A	A	G	A	T	A	T	T	C	T	A	T	A	A	A	G	A	A	T	C	A	C	A	T	A	C	T	T	G	G	A	T	A	T	C	A	A	G	T	G	C	A	T	A	A	G	G	T	T
LX07	A	A	G	A	T	A	T	T	C	T	A	T	A	A	A	G	A	A	T	C	A	C	A	T	A	C	T	T	G	G	A	T	A	T	C	A	A	G	T	G	C	A	T	A	A	G	G	T	T
LX08	A	A	G	A	T	A	T	T	C	T	A	T	A	A	A	G	A	A	T	C	A	C	A	T	A	C	T	T	G	G	A	T	A	T	C	A	A	G	T	G	C	A	T	A	A	G	G	T	T
LX09	A	A	G	A	T	A	T	T	C	T	A	T	A	A	A	G	A	A	T	C	A	C	A	T	A	C	T	T	G	G	A	T	A	T	C	A	A	G	T	G	C	A	T	A	A	G	G	T	T
LX10	A	A	G	A	T	A	T	T	C	T	A	T	A	A	A	G	A	A	T	C	A	C	A	T	A	C	T	T	G	G	A	T	A	T	C	A	A	G	T	G	C	A	T	A	A	G	G	T	T
LX11	A	A	G	A	T	A	T	T	C	T	A	T	A	A	A	G	A	A	T	C	A	C	A	T	A	C	T	T	G	G	A	T	A	T	C	A	A	G	T	G	C	A	T	A	A	G	G	T	T
LX12	A	A	G	A	T	A	T	T	C	T	A	T	A	A	A	G	A	A	T	C	A	C	A	T	A	C	T	T	G	G	A	T	A	T	C	A	A	G	T	G	C	A	T	A	A	G	G	T	T
NU102	A	A	G	A	T	A	T	T	C	T	A	T	A	A	A	G	A	A	T	C	A	C	A	T	A	C	T	T	G	G	A	T	A	T	C	A	A	G	T	G	C	A	T	A	A	G	G	T	T
NU103	A	A	G	A	T	A	T	T	C	T	A	T	A	A	A	G	A	A	T	C	A	C	A	T	A	C	T	T	G	G	A	T	A	T	C	A	A	G	T	G	C	A	T	A	A	G	G	T	T
NU104	A	A	G	A	T	A	T	T	C	T	A	T	A	A	A	G	A	A	T	C	A	C	A	T	A	C	T	T	G	G	A	T	A	T	C	A	A	G	T	G	C	A	T	A	A	G	G	T	T
NU105	A	A	G	A	T	A	T	T	C	T	A	T	A	A	A	G	A	A	T	C	A	C	A	T	A	C	T	T	G	G	A	T	A	T	C	A	A	G	T	G	C	A	T	A	A	G	G	T	T
NU106	A	A	G	A	T	A	T	T	C	T	A	T	A	A	A	G	A	A	T	C	A	C	A	T	A	C	T	T	G	G	A	T	A	T	C	A	A	G	T	G	C	A	T	A	A	G	G	T	T
NU107	A	A	G	A	T	A	T	T	C	T	A	T	A	A	A	G	A	A	T	C	A	C	A	T	A	C	T	T	G	G	A	T	A	T	C	A	A	G	T	G	C	A	T	A	A	G	G	T	T
NU108	A	A	G	A	T	A	T	T	C	T	A	T	A	A	A	G	A	A	T	C	A	C	A	T	A	C	T	T	G	G	A	T	A	T	C	A	A	G	T	G	C	A	T	A	A	G	G	T	T
NU109	A	A	G	A	T	A	T	T	C	T	A	T	A	A	A	G	A	A	T	C	A	C	A	T	A	C	T	T	G	G	A	T	A	T	C	A	A	G	T	G	C	A	T	A	A	G	G	T	T
NU110	A	A	G	A	T	A	T	T	C	T	A	T	A	A	A	G	A	A	T	C	A	C	A	T	A	C	T	T	G	G	A	T	A	T	C	A	A	G	T	G	C	A	T	A	A	G	G	T	T
NU111	A	A	G	A	T	A	T	T	C	T	A	T	A	A	A	G	A	A	T	C	A	C	A	T	A	C	T	T	G	G	A	T	A	T	C	A	A	G	T	G	C	A	T	A	A	G	G	T	T
NU112	A	A	G	A	T	A	T	T	C	T	A	T	A	A	A	G	A	A	T	C	A	C	A	T	A	C	T	T	G	G	A	T	A	T	C	A	A	G	T	G	C	A	T	A	A	G	G	T	T
NU113	A	A	G	A	T	A	T	T	C	T	A	T	A	A	A	G	A	A	T	C	A	C	A	T	A	C	T	T	G	G	A	T	A	T	C	A	A	G	T	G	C	A	T	A	A	G	G	T	T
OY4	A	A	G	A	T	A	T	T	C	T	A	T	A	A	A	G	A	A	T	C	A	C	A	T	A	C	T	T	G	G	A	T	A	T	C	A	A	G	T	G	C	A	T	A	A	G	G	T	T
OY5	A	A	G	A	T	A	T	T	C	T	A	T	A	A	A	G	A	A	T	C	A	C	A	T	A	C	T	T	G	G	A	T	A	T	C	A	A	G	T	G	C	A	T	A	A	G	G	T	T
OY6	A	A	G	A	T	A	T	T	C	T	A	T	A	A	A	G	A	A	T	C	A	C	A	T	A	C	T	T	G	G	A	T	A	T	C	A	A	G	T	G	C	A	T	A	A	G	G	T	T
OY7	A	A	G	A	T	A	T	T	C	T	A	T	A	A	A	G	A	A	T	C	A	C	A	T	A	C	T	T	G	G	A	T	A	T	C	A	A	G	T	G	C	A	T	A	A	G	G	T	T
OY8	A	A	G	A	T	A	T	T	C	T	A	T	A	A	A	G	A	A	T	C	A	C	A	T	A	C	T	T	G	G	A	T	A	T	C	A	A	G	T	G	C	A	T	A	A	G	G	T	T
OY12	A	A	G	A	T	A	T	T	C	T	A	T	A	A	A	G	A	A	T	C	A	C	A	T	A	C	T	T	G	G	A	T	A	T	C	A	A	G	T	G	C	A	T	A	A	G	G	T	T
OY13	A	A	G	A	T	A	T	T	C	T	A	T	A	A	A	G	A	A	T	C	A	C	A	T	A	C	T	T	G	G	A	T	A	T	C	A	A	G	T	G	C	A	T	A	A	G	G	T	T
OY14	A	A	G	A	T	A	T	T	C	T	A	T	A	A	A	G	A	A	T	C	A	C	A	T	A	C	T	T	G	G	A	T	A	T	C	A	A	G	T	G	C	A	T	A	A	G	G	T	T
OY17	A	A	G	A	T	A	T	T	C	T	A	T	A	A	A	G	A	A	T	C	A	C	A	T	A	C	T	T	G	G	A	T	A	T	C	A	A	G	T	G	C	A	T	A	A	G	G	T	T
OY18	A	A	G	A	T	A	T	T	C	T	A	T	A	A	A	G	A	A	T	C	A	C	A	T	A	C	T	T	G	G	A	T	A	T	C	A	A	G	T	G	C	A	T	A	A	G	G	T	T
OY19	A	A	G	A	T	A	T	T	C	T	A	T	A	A	A	G	A	A	T	C	A	C	A	T	A	C	T	T	G	G	A	T	A	T	C	A	A	G	T	G	C	A	T	A	A	G	G	T	T
OY20	A	A	G	A	T	A	T	T	C	T	A	T	A	A	A	G	A	A	T	C	A	C	A	T	A	C	T	T	G	G	A	T	A	T	C	A	A	G	T	G	C	A	T	A	A	G	G	T	T
UF931	A	A	G	A	T	A	T	T	C	T	A	T	A	A	A	G	A	A	T	C	A	C	A	T	A	C	T	T	G	G	A	T	A	T	C	A	A	G	T	G	C	A	T	A	A	G	G	T	T
UF932	A	A	G	A	T	A	T	T	C	T	A	T	A	A	A	G	A	A	T	C	A	C	A	T	A	C	T	T	G	G	A	T	A	T	C	A	A	G	T	G	C	A	T	A	A	G	G	T	T
UF933	A	A	G	A	T	A	T	T	C	T	A	T	A	A	A	G	A	A	T	C	A	C	A	T	A	C	T	T	G	G	A	T	A	T	C	A	A	G	T	G	C	A	T	A	A	G	G	T	T
UF934	A	A	G	A	T	A	T	T	C	T	A	T	A	A	A	G	A	A	T	C	A	C	A	T	A	C	T	T	G	G	A	T	A	T	C	A	A	G	T	G	C	A	T	A	A	G	G	T	T
UF935	A	A	G	A	T	A	T	T	C	T	A	T	A	A	A	G	A	A	T	C	A	C	A	T	A	C	T	T	G	G	A	T	A	T	C	A	A	G	T	G	C	A	T	A	A	G	G	T	T
UF936	A	A	G	A	T	A	T	T	C	T	A	T	A	A	A	G	A	A	T	C	A	C	A	T	A	C	T	T	G	G	A	T	A	T	C	A	A	G	T	G	C	A	T	A	A	G	G	T	T
UF937	A	A	G	A	T	A	T	T	C	T	A	T	A	A	A	G	A	A	T	C	A	C	A	T	A	C	T	T	G	G	A	T	A	T	C	A	A	G	T	G	C	A	T	A	A	G	G	T	T
UF938	A	A	G	A	T	A	T	T	C	T	A	T	A	A	A	G	A	A	T	C	A	C	A	T	A	C	T	T	G	G	A	T	A	T	C	A	A	G	T	G	C	A	T	A	A	G	G	T	T
UF939	A	A	G	A	T	A	T	T	C	T	A	T	A	A	A	G	A	A	T	C	A	C	A	T	A	C	T	T	G	G	A	T	A	T	C	A	A	G	T	G	C	A	T	A	A	G	G	T	T
UF940	A	A	G	A	T	A	T	T	C	T	A	T	A	A	A	G	A	A	T	C	A	C	A	T	A	C	T	T	G	G	A	T	A	T	C	A	A	G	T	G	C	A	T	A	A	G	G	T	T
G952	A	A	G	A	T	A	T	T	C	T	A	T	A	A	A	G	A	A	T	C	A	C	A	T	A	C	T	T	G	G	A	T	A	T	C	A	A	G	T	G	C	A	T	A	A	G	G	T	T
G954	A	A	G	A	T	A	T	T	C	T	A	T	A	A	A	G	A	A	T	C	A	C	A	T	A	C	T	T	G	G	A	T	A	T	C	A	A	G	T	G	C	A	T	A	A	G	G	T	T
G959	A	A	G	A	T	A	T	T	C	T	A	T	A	A	A	G	A	A	T	C	A	C	A	T	A	C	T	T	G	G	A	T	A	T	C	A	A	G	T	G	C	A	T	A	A	G	G	T	T
G960	A	A	G	A	T	A	T	T	C	T	A	T	A	A	A	G	A	A	T	C	A	C	A	T	A	C	T	T	G	G	A	T	A	T	C	A	A	G	T	G	C	A	T	A	A	G	G	T	T
G961	A	A	G	A	T	A	T	T	C	T	A	T	A	A	A	G	A	A	T	C	A	C	A	T	A	C	T	T	G	G	A	T	A	T	C	A	A	G	T	G	C	A	T	A	A	G	G	T	T
G964	A	A	G	A	T	A	T	T	C	T	A	T	A	A	A	G	A	A	T	C	A	C	A	T	A	C	T	T	G	G	A	T	A	T	C	A	A	G	T	G	C	A	T	A	A	G	G	T	T
G969	A	A	G	A	T	A	T	T	C	T	A	T	A	A	A	G	A	A	T	C	A	C	A	T	A	C	T	T	G	G	A	T	A	T	C	A	A	G	T	G	C	A	T	A	A	G	G	T	T
H275	A	A	G	A	T	A	T	T	C	T	A	T	A	A	A	G	A	A	T	C	A	C	A	T	A	C	T	T	G	G	A	T	A	T	C	A	A	G	T	G	C	A	T	A	A	G	G	T	T
H281	A	A	G	A	T	A	T	T	C	T	A	T	A	A	A	G	A	A	T	C	A	C	A	T	A	C	T	T	G	G	A	T	A	T	C	A	A	G	T	G	C	A	T	A	A	G	G	T	T
H385	A	A	G	A	T	A	T	T	C	T	A	T	A	A	A	G	A	A	T	C	A	C	A	T	A	C	T	T	G	G	A	T	A	T	C	A	A	G	T	G	C	A	T	A	A	G	G	T	T
H390	A	A	G	A	T	A	T	T	C	T	A	T	A	A	A	G	A	A	T	C	A	C	A	T	A	C	T	T	G	G	A	T	A	T	C	A	A	G	T	G	C	A	T	A	A	G	G	T	T
H391	A	A	G	A	T	A	T	T	C	T	A	T	A	A	A	G	A	A	T	C	A	C	A	T	A	C	T	T	G	G	A	T	A	T	C	A	A	G	T	G	C	A	T	A	A	G	G	T	T
TW21	A	A	G	A	T	A	T	T	C	T	A	T	A	A	A	G	A	A	T	C	A	C	A	T	A	C	T	T	G	G	A	T	A	T	C	A	A	G	T	G	C	A	T	A	A	G	G	T	T
TW22	A	A	G	A	T	A	T	T	C	T	A	T	A	A	A	G	A	A	T	C	A	C	A	T	A	C	T	T	G	G	A	T	A	T	C	A	A	G	T	G	C	A	T	A	A	G	G	T	T
TW23	A	A	G	A	T	A	T	T	C	T	A	T	A	A	A	G	A	A	T	C	A	C	A	T	A	C	T	T	G	G	A	T	A	T	C	A	A	G	T	G	C	A	T	A	A	G	G	T	T
TW28	A	A	G	A	T	A	T	T	C	T	A	T	A	A	A	G	A	A	T	C	A	C	A	T	A	C	T	T	G	G	A	T	A	T	C	A	A	G	T	G	C	A	T	A	A	G	G	T	T
TW30	A	A	G	A	T	A	T	T	C	T	A	T	A	A	A	G	A	A	T	C	A	C	A	T	A	C	T	T	G	G	A	T	A	T	C	A	A	G	T	G	C	A	T	A	A	G	G	T	T
TW33	A	A	G	A	T	A	T	T	C	T	A	T	A	A	A	G	A	A	T	C	A	C	A	T	A	C	T	T	G	G	A	T	A	T	C	A	A	G	T	G	C	A	T	A	A	G	G	T	T
TW38	A	A	G	A	T	A	T	T	C	T	A	T	A	A	A	G	A	A	T	C	A	C	A	T	A	C	T	T	G	G	A	T	A	T	C	A	A	G	T	G	C	A	T	A	A	G	G	T	T
TW233	A	A	G	A	T	A	T	T	C	T	A	T	A	A	A	G	A	A	T	C	A	C	A	T	A	C	T	T	G	G	A	T	A	T	C	A	A	G	T	G	C	A	T	A	A	G	G	T	T
TW237	A	A	G	A	T	A	T	T	C	T	A	T	A	A	A	G	A	A	T	C	A	C	A	T	A	C	T	T	G	G	A	T	A	T	C	A	A	G	T	G	C	A	T	A	A	G	G	T	T
TW238	A	A	G	A	T	A	T	T	C	T	A	T	A	A	A	G	A	A	T	C	A	C	A	T	A	C	T	T	G	G	A	T	A	T	C	A	A	G	T	G	C	A	T	A	A	G	G	T	T
TW239	A	A	G	A	T	A	T	T	C	T	A	T	A	A	A	G	A	A	T	C	A	C	A	T	A	C	T	T	G	G	A	T	A	T	C	A	A	G	T	G	C	A	T	A	A	G	G	T	T
TW240	A	A	G	A	T	A	T	T	C	T	A	T	A	A	A	G	A	A	T	C	A	C	A	T	A	C	T	T	G	G	A	T	A	T	C	A	A	G	T	G	C	A	T	A	A	G	G	T	T
HF01	A	A	G	A	T	A	T	T	C	T	A	T	A	A	A	G	A	A	T	C	A	C	A	T	A	C	T	T	G	G	A	T	A	T	C	A	A	G	T	G	C	A	T	A	A	G	G	T	T
HF02	A	A	G	A	T	A	T	T	C	T	A	T	A	A	A	G	A	A	T	C	A	C	A	T	A	C	T	T	G	G	A	T	A	T	C	A	A	G	T	G	C	A	T	A	A	G	G	T	T
HF03	A	A	G	A	T	A	T	T	C	T	A	T	A	A	A	G	A	A	T	C	A	C	A	T	A	C	T	T	G	G	A	T	A	T	C	A	A	G	T	G	C	A	T	A	A	G	G	T	T
HF04	A	A	G	A	T	A	T	T	C	T	A	T	A	A	A	G	A	A	T	C	A	C	A	T	A	C	T	T	G	G	A	T	A	T	C	A	A	G	T	G	C	A	T	A	A	G	G	T	T
HF05	A	A	G	A	T	A	T	T	C	T	A	T	A	A	A	G	A	A	T	C	A	C	A	T	A	C	T	T	G	G	A	T	A	T	C	A	A	G	T	G	C	A	T	A	A	G	G	T	T
HF06	A	A	G	A	T	A	T	T	C	T	A	T	A	A	A	G	A	A	T	C	A	C	A	T	A	C	T	T	G	G	A	T	A	T	C	A	A	G	T	G	C	A	T	A	A	G	G	T	T
HF07	A	A	G	A	T	A	T	T	C	T	A	T	A	A	A	G	A	A	T	C	A	C	A	T	A	C	T	T	G	G	A	T	A	T	C	A	A	G	T	G	C	A	T	A	A	G	G	T	T
HF11	A	A	G	A	T	A	T	T	C	T	A	T	A	A	A	G	A	A	T	C	A	C	A	T	A	C	T	T	G	G	A	T	A	T	C	A	A	G	T	G	C	A	T	A	A	G	G	T	T
HF12	A	A	G	A	T	A	T	T	C	T	A	T	A	A	A	G	A	A	T	C	A	C	A	T	A	C	T	T	G	G	A	T	A	T	C	A	A	G	T	G	C	A	T	A	A	G	G	T	T
HF13	A	A	G	A	T	A	T	T	C	T	A	T	A	A	A	G	A	A	T	C	A	C	A	T	A	C	T	T	G	G	A	T	A	T	C	A	A	G	T	G	C	A	T	A	A	G	G	T	T
HF14	A	A	G	A	T	A	T	T	C	T	A	T	A	A	A	G	A	A	T	C	A	C	A	T	A	C	T	T	G	G	A	T	A	T	C	A	A	G	T	G	C	A	T	A	A	G	G	T	T
HF15	A	A	G	A	T	A	T	T	C	T	A	T	A	A	A	G	A	A	T	C	A	C	A	T	A	C	T	T	G	G	A	T	A	T	C	A	A	G	T	G	C	A	T	A	A	G	G	T	T
SG01	A	A	G	A	T	A	T	T	C	T	A	T	A	A	A	G	A	A	T	C	A	C	A	T	A	C	T	T	G	G	A	T	A	T	C	A	A	G	T	G	C	A	T	A	A	G	G	T	T
SG02	A	A	G	A	T	A	T	T	C	T	A	T	A	A	A	G	A	A	T	C	A	C	A	T	A	C	T	T	G	G	A	T	A	T	C	A	A	G	T	G	C	A	T	A	A	G	G	T	T
SG03	A	A	G	A	T	A	T	T	C	T	A	T	A	A	A	G	A	A	T	C	A	C	A	T	A	C	T	T	G	G	A	T	A	T	C	A	A	G	T	G	C	A	T	A	A	G	G	T	T
SG04	A	A	G	A	T	A	T	T	C	T	A	T	A	A	A	G	A	A	T	C	A	C	A	T	A	C	T	T	G	G	A	T	A	T	C	A	A	G	T	G	C	A	T	A	A	G	G	T	T
SG05	A	A	G	A	T	A	T	T	C	T	A	T	A	A	A	G	A	A	T	C	A	C	A	T	A	C	T	T	G	G	A	T	A	T	C	A	A	G	T	G	C	A	T	A	A	G	G	T	T
SG06	A	A	G	A	T	A	T	T	C	T	A	T	A	A	A	G	A	A	T	C	A	C	A	T	A	C	T	T	G	G	A	T	A	T	C	A	A	G	T	G	C	A	T	A	A	G	G	T	T
SG07	A	A	G	A	T	A	T	T	C	T	A	T	A	A	A	G	A	A	T	C	A	C	A	T	A	C	T	T	G	G	A	T	A	T	C	A	A	G	T	G	C	A	T	A	A	G	G	T	T
SG08	A	A	G	A	T	A	T	T	C	T	A	T	A	A	A	G	A	A	T	C	A	C	A	T	A	C	T	T	G	G	A	T	A	T	C	A	A	G	T	G	C	A	T	A	A	G	G	T	T
SG09	A	A	G	A	T	A	T	T	C	T	A	T	A	A	A	G	A	A	T	C	A	C	A	T	A	C	T	T	G	G	A	T	A	T	C	A	A	G	T	G	C	A	T	A	A	G	G	T	T
SG10	A	A	G	A	T	A	T	T	C	T	A	T	A	A	A	G	A	A	T	C	A	C	A	T	A	C	T	T	G	G	A	T	A	T	C	A	A	G	T	G	C	A	T	A	A	G	G	T	T
SG11	A	A	G	A	T	A	T	T	C	T	A	T	A	A	A	G	A	A	T	C	A	C	A	T	A	C	T	T	G	G	A	T	A	T	C	A	A	G	T	G	C	A	T	A	A	G	G	T	T
SG12	A	A	G	A	T	A	T	T	C	T	A	T	A	A	A	G	A	A	T	C	A	C	A	T	A	C	T	T	G	G	A	T	A	T	C	A	A	G	T	G	C	A	T	A	A	G	G	T	T
BJ01	A	A	G	A	T	A	T	T	C	T	A	T	A	A	A	G	A	A	T	C	A	C	A	T	A	C	T	T	G	G	A	T	A	T	C	A	A	G	T	G	C	A	T	A	A	G	G	T	T
BJ02	A	A	G	A	T	A	T	T	C	T	A	T	A	A	A	G	A	A	T	C	A	C	A	T	A	C	T	T	G	G	A	T	A	T	C	A	A	G	T	G	C	A	T	A	A	G	G	T	T
BJ03	A	A	G	A	T	A	T	T	C	T	A	T	A	A	A	G	A	A	T	C	A	C	A	T	A	C	T	T	G	G	A	T	A	T	C	A	A	G	T	G	C	A	T	A	A	G	G	T	T
BJ04	A	A	G	A	T	A	T	T	C	T	A	T	A	A	A	G	A	A	T	C	A	C	A	T	A	C	T	T	G	G	A	T	A	T	C	A	A	G	T	G	C	A	T	A	A	G	G	T	T
BJ05	A	A	G	A	T	A	T	T	C	T	A	T	A	A	A	G	A	A	T	C	A	C	A	T	A	C	T	T	G	G	A	T	A	T	C	A	A	G	T	G	C	A	T	A	A	G	G	T	T
BJ06	A	A	G	A	T	A	T	T	C	T	A	T	A	A	A	G	A	A	T	C	A	C	A	T	A	C	T	T	G	G	A	T	A	T	C	A	A	G	T	G	C	A	T	A	A	G	G	T	T
BJ07	A	A	G	A	T	A	T	T	C	T	A	T	A	A	A	G	A	A	T	C	A	C	A	T	A	C	T	T	G	G	A	T	A	T	C	A	A	G	T	G	C	A	T	A	A	G	G	T	T
BJ08	A	A	G	A	T	A	T	T	C	T	A	T	A	A	A	G	A	A	T	C	A	C	A	T	A	C	T	T	G	G	A	T	A	T	C	A	A	G	T	G	C	A	T	A	A	G	G	T	T
BJ09	A	A	G	A	T	A	T	T	C	T	A	T	A	A	A	G	A	A	T	C	A	C	A	T	A	C	T	T	G	G	A	T	A	T	C	A	A	G	T	G	C	A	T	A	A	G	G	T	T
BJ10	A	A	G	A	T	A	T	T	C	T	A	T	A	A	A	G	A	A	T	C	A	C	A	T	A	C	T	T	G	G	A	T	A	T	C	A	A	G	T	G	C	A	T	A	A	G	G	T	T
BJ12	A	A	G	A	T	A	T	T	C	T	A	T	A	A	A	G	A	A	T	C	A	C	A	T	A	C	T	T	G	G	A	T	A	T	C	A	A	G	T	G	C	A	T	A	A	G	G	T	T
NU01	A	A	G	A	T	A	T	T	C	T	A	T	A	A	A	G	A	A	T	C	A	C	A	T	A	C	T	T	G	G	A	T	A	T	C	A	A	G	T	G	C	A	T	A	A	G	G	T	T
NU02	A	A	G	A	T	A	T	T	C	T	A	T	A	A	A	G	A	A	T	C	A	C	A	T	A	C	T	T	G	G	A	T	A	T	C	A	A	G	T	G	C	A	T	A	A	G	G	T	T
NU03	A	A	G	A	T	A	T	T	C	T	A	T	A	A	A	G	A	A	T	C	A	C	A	T	A	C	T	T	G	G	A	T	A	T	C	A	A	G	T	G	C	A	T	A	A	G	G	T	T
NU04	A	A	G	A	T	A	T	T	C	T	A	T	A	A	A	G	A	A	T	C	A	C	A	T	A	C	T	T	G	G	A	T	A	T	C	A	A	G	T	G	C	A	T	A	A	G	G	T	T
NU05	A	A	G	A	T	A	T	T	C	T	A	T	A	A	A	G	A	A	T	C	A	C	A	T	A	C	T	T	G	G	A	T	A	T	C	A	A	G	T	G	C	A	T	A	A	G	G	T	T
NU06	A	A	G	A	T	A	T	T	C	T	A	T	A	A	A	G	A	A	T	C	A	C	A	T	A	C	T	T	G	G	A	T	A	T	C	A	A	G	T	G	C	A	T	A	A	G	G	T	T
NU07	A	A	G	A	T	A	T	T	C	T	A	T	A	A	A	G	A	A	T	C	A	C	A	T	A	C	T	T	G	G	A	T	A	T	C	A	A	G	T	G	C	A	T	A	A	G	G	T	T
NU08	A	A	G	A	T	A	T	T	C	T	A	T	A	A	A	G	A	A	T	C	A	C	A	T	A	C	T	T	G	G	A	T	A	T	C	A	A	G	T	G	C	A	T	A	A	G	G	T	T
NU09	A	A	G	A	T	A	T	T	C	T	A	T	A	A	A	G	A	A	T	C	A	C	A	T	A	C	T	T	G	G	A	T	A	T	C	A	A	G	T	G	C	A	T	A	A	G	G	T	T
NU10	A	A	G	A	T	A	T	T	C	T	A	T	A	A	A	G	A	A	T	C	A	C	A	T	A	C	T	T	G	G	A	T	A	T	C	A	A	G	T	G	C	A	T	A	A	G	G	T	T
NU11	A	A	G	A	T	A	T	T	C	T	A	T	A	A	A	G	A	A	T	C	A	C	A	T	A	C	T	T	G	G	A	T	A	T	C	A	A	G	T	G	C	A	T	A	A	G	G	T	T
NU12	A	A	G	A	T	A	T	T	C	T	A	T	A	A	A	G	A	A	T	C	A	C	A	T	A	C	T	T	G	G	A	T	A	T	C	A	A	G	T	G	C	A	T	A	A	G	G	T	T
ER01	A	A	G	A	T	A	T	T	C	T	A	T	A	A	A	G	A	A	T	C	A	C	A	T	A	C	T	T	G	G	A	T	A	T	C	A	A	G	T	G	C	A	T	A	A	G	G	T	T
ER02	A	A	G	A	T	A	T	T	C	T	A	T	A	A	A	G	A	A	T	C	A	C	A	T	A	C	T	T	G	G	A	T	A	T	C	A	A	G	T	G	C	A	T	A	A	G	G	T	T
ER03	A	A	G	A	T	A	T	T	C	T	A	T	A	A	A	G	A	A	T	C	A	C	A	T	A	C	T	T	G	G	A	T	A	T	C	A	A	G	T	G	C	A	T	A	A	G	G	T	T
ER04	A	A	G	A	T	A	T	T	C	T	A	T	A	A	A	G	A	A	T	C	A	C	A	T	A	C	T	T	G	G	A	T	A	T	C	A	A	G	T	G	C	A	T	A	A	G	G	T	T
ER05	A	A	G	A	T	A	T	T	C	T	A	T	A	A	A	G	A	A	T	C	A	C	A	T	A	C	T	T	G	G	A	T	A	T	C	A	A	G	T	G	C	A	T	A	A	G	G	T	T
ER06	A	A	G	A	T	A	T	T	C	T	A	T	A	A	A	G	A	A	T	C	A	C	A	T	A	C	T	T	G	G	A	T	A	T	C	A	A	G	T	G	C	A	T	A	A	G	G	T	T
ER07	A	A	G	A	T	A	T	T	C	T	A	T	A	A	A	G	A	A	T	C	A	C	A	T	A	C	T	T	G	G	A	T	A	T	C	A	A	G	T	G	C	A	T	A	A	G	G	T	T
ER08	A	A	G	A	T	A	T	T	C	T	A	T	A	A	A	G	A	A	T	C	A	C	A	T	A	C	T	T	G	G	A	T	A	T	C	A	A	G	T	G	C	A	T	A	A	G	G	T	T
ER09	A	A	G	A	T	A	T	T	C	T	A	T	A	A	A	G	A	A	T	C	A	C	A	T	A	C	T	T	G	G	A	T	A	T	C	A	A	G	T	G	C	A	T	A	A	G	G	T	T
ER10	A	A	G	A	T	A	T	T	C	T	A	T	A	A	A	G	A	A	T	C	A	C	A	T	A	C	T	T	G	G	A	T	A	T	C	A	A	G	T	G	C	A	T	A	A	G	G	T	T
ER11	A	A	G	A	T	A	T	T	C	T	A	T	A	A	A	G	A	A	T	C	A	C	A	T	A	C	T	T	G	G	A	T	A	T	C	A	A	G	T	G	C	A	T	A	A	G	G	T	T
ER12	A	A	G	A	T	A	T	T	C	T	A	T	A	A	A	G	A	A	T	C	A	C	A	T	A	C	T	T	G	G	A	T	A	T	C	A	A	G	T	G	C	A	T	A	A	G	G	T	T
KO02	A	A	G	A	T	A	T	T	C	T	A	T	A	A	A	G	A	A	T	C	A	C	A	T	A	C	T	T	G	G	A	T	A	T	C	A	A	G	T	G	C	A	T	A	A	G	G	T	T
KO03	A	A	G	A	T	A	T	T	C	T	A	T	A	A	A	G	A	A	T	C	A	C	A	T	A	C	T	T	G	G	A	T	A	T	C	A	A	G	T	G	C	A	T	A	A	G	G	T	T
KO04	A	A	G	A	T	A	T	T	C	T	A	T	A	A	A	G	A	A	T	C	A	C	A	T	A	C	T	T	G	G	A	T	A	T	C	A	A	G	T	G	C	A	T	A	A	G	G	T	T
KO05	A	A	G	A	T	A	T	T	C	T	A	T	A	A	A	G	A	A	T	C	A	C	A	T	A	C	T	T	G	G	A	T	A	T	C	A	A	G	T	G	C	A	T	A	A	G	G	T	T
KO06	A	A	G	A	T	A	T	T	C	T	A	T	A	A	A	G	A	A	T	C	A	C	A	T	A	C	T	T	G	G	A	T	A	T	C	A	A	G	T	G	C	A	T	A	A	G	G	T	T
KO07	A	A	G	A	T	A	T	T	C	T	A	T	A	A	A	G	A	A	T	C	A	C	A	T	A	C	T	T	G	G	A	T	A	T	C	A	A	G	T	G	C	A	T	A	A	G	G	T	T
KO08	A	A	G	A	T	A	T	T	C	T	A	T	A	A	A	G	A	A	T	C	A	C	A	T	A	C	T	T	G	G	A	T	A	T	C	A	A	G	T	G	C	A	T	A	A	G	G	T	T
KO09	A	A	G	A	T	A	T	T	C	T	A	T	A	A	A	G	A	A	T	C	A	C	A	T	A	C	T	T	G	G	A	T	A	T	C	A	A	G	T	G	C	A	T	A	A	G	G	T	T
KO10	A	A	G	A	T	A	T	T	C	T	A	T	A	A	A	G	A	A	T	C	A	C	A	T	A	C	T	T	G	G	A	T	A	T	C	A	A	G	T	G	C	A	T	A	A	G	G	T	T
KO11	A	A	G	A	T	A	T	T	C	T	A	T	A	A	A	G	A	A	T	C	A	C	A	T	A	C	T	T	G	G	A	T	A	T	C	A	A	G	T	G	C	A	T	A	A	G	G	T	T
KO12	A	A	G	A	T	A	T	T	C	T	A	T	A	A	A	G	A	A	T	C	A	C	A	T	A	C	T	T	G	G	A	T	A	T	C	A	A	G	T	G	C	A	T	A	A	G	G	T	T
NE01	A	A	G	A	T	A	T	T	C	T	A	T	A	A	A	G	A	A	T	C	A	C	A	T	A	C	T	T	G	G	A	T	A	T	C	A	A	G	T	G	C	A	T	A	A	G	G	T	T
NE02	A	A	G	A	T	A	T	T	C	T	A	T	A	A	A	G	A	A	T	C	A	C	A	T	A	C	T	T	G	G	A	T	A	T	C	A	A	G	T	G	C	A	T	A	A	G	G	T	T
NE03	A	A	G	A	T	A	T	T	C	T	A	T	A	A	A	G	A	A	T	C	A	C	A	T	A	C	T	T	G	G	A	T	A	T	C	A	A	G	T	G	C	A	T	A	A	G	G	T	T
NE04	A	A	G	A	T	A	T	T	C	T	A	T	A	A	A	G	A	A	T	C	A	C	A	T	A	C	T	T	G	G	A	T	A	T	C	A	A	G	T	G	C	A	T	A	A	G	G	T	T
NE05	A	A	G	A	T	A	T	T	C	T	A	T	A	A	A	G	A	A	T	C	A	C	A	T	A	C	T	T	G	G	A	T	A	T	C	A	A	G	T	G	C	A	T	A	A	G	G	T	T
NE06	A	A	G	A	T	A	T	T	C	T	A	T	A	A	A	G	A	A	T	C	A	C	A	T	A	C	T	T	G	G	A	T	A	T	C	A	A	G	T	G	C	A	T	A	A	G	G	T	T
NE07	A	A	G	A	T	A	T	T	C	T	A	T	A	A	A	G	A	A	T	C	A	C	A	T	A	C	T	T	G	G	A	T	A	T	C	A	A	G	T	G	C	A	T	A	A	G	G	T	T
NE08	A	A	G	A	T	A	T	T	C	T	A	T	A	A	A	G	A	A	T	C	A	C	A	T	A	C	T	T	G	G	A	T	A	T	C	A	A	G	T	G	C	A	T	A	A	G	G	T	T
NE09	A	A	G	A	T	A	T	T	C	T	A	T	A	A	A	G	A	A	T	C	A	C	A	T	A	C	T	T	G	G	A	T	A	T	C	A	A	G	T	G	C	A	T	A	A	G	G	T	T
NE10	A	A	G	A	T	A	T	T	C	T	A	T	A	A	A	G	A	A	T	C	A	C	A	T	A	C	T	T	G	G	A	T	A	T	C	A	A	G	T	G	C	A	T	A	A	G	G	T	T
NE11	A	A	G	A	T	A	T	T	C	T	A	T	A	A	A	G	A	A	T	C	A	C	A	T	A	C	T	T	G	G	A	T	A	T	C	A	A	G	T	G	C	A	T	A	A	G	G	T	T
NE13	A	A	G	A	T	A	T	T	C	T	A	T	A	A	A	G	A	A	T	C	A	C	A	T	A	C	T	T	G	G	A	T	A	T	C	A	A	G	T	G	C	A	T	A	A	G	G	T	T
NA01	A	A	G	A	T	A	T	T	C	T	A	T	A	A	A	G	A	A	T	C	A	C	A	T	A	C	T	T	G	G	A	T	A	T	C	A	A	G	T	G	C	A	T	A	A	G	G	T	T
NA02	A	A	G	A	T	A	T	T	C	T	A	T	A	A	A	G	A	A	T	C	A	C	A	T	A	C	T	T	G	G	A	T	A	T	C	A	A	G	T	G	C	A	T	A	A	G	G	T	T
NA03	A	A	G	A	T	A	T	T	C	T	A	T	A	A	A	G	A	A	T	C	A	C	A	T	A	C	T	T	G	G	A	T	A	T	C	A	A	G	T	G	C	A	T	A	A	G	G	T	T
NA04	A	A	G	A	T	A	T	T	C	T	A	T	A	A	A	G	A	A	T	C	A	C	A	T	A	C	T	T	G	G	A	T	A	T	C	A	A	G	T	G	C	A	T	A	A	G	G	T	T
NA05	A	A	G	A	T	A	T	T	C	T	A	T	A	A	A	G	A	A	T	C	A	C	A	T	A	C	T	T	G	G	A	T	A	T	C	A	A	G	T	G	C	A	T	A	A	G	G	T	T
NA06	A	A	G	A	T	A	T	T	C	T	A	T	A	A	A	G	A	A	T	C	A	C	A	T	A	C	T	T	G	G	A	T	A	T	C	A	A	G	T	G	C	A	T	A	A	G	G	T	T
NA07	A	A	G	A	T	A	T	T	C	T	A	T	A	A	A	G	A	A	T	C	A	C	A	T	A	C	T	T	G	G	A	T	A	T	C	A	A	G	T	G	C	A	T	A	A	G	G	T	T
NA08	A	A	G	A	T	A	T	T	C	T	A	T	A	A	A	G	A	A	T	C	A	C	A	T	A	C	T	T	G	G	A	T	A	T	C	A	A	G	T	G	C	A	T	A	A	G	G	T	T
NA09	A	A	G	A	T	A	T	T	C	T	A	T	A	A	A	G	A	A	T	C	A	C	A	T	A	C	T	T	G	G	A	T	A	T	C	A	A	G	T	G	C	A	T	A	A	G	G	T	T
NA10	A	A	G	A	T	A	T	T	C	T	A	T	A	A	A	G	A	A	T	C	A	C	A	T	A	C	T	T	G	G	A	T	A	T	C	A	A	G	T	G	C	A	T	A	A	G	G	T	T
NA11	A	A	G	A	T	A	T	T	C	T	A	T	A	A	A	G	A	A	T	C	A	C	A	T	A	C	T	T	G	G	A	T	A	T	C	A	A	G	T	G	C	A	T	A	A	G	G	T	T
NA12	A	A	G	A	T	A	T	T	C	T	A	T	A	A	A	G	A	A	T	C	A	C	A	T	A	C	T	T	G	G	A	T	A	T	C	A	A	G	T	G	C	A	T	A	A	G	G	T	T
RY01	A	A	G	A	T	A	T	T	C	T	A	T	A	A	A	G	A	A	T	C	A	C	A	T	A	C	T	T	G	G	A	T	A	T	C	A	A	G	T	G	C	A	T	A	A	G	G	T	T
RY02	A	A	G	A	T	A	T	T	C	T	A	T	A	A	A	G	A	A	T	C	A	C	A	T	A	C	T	T	G	G	A	T	A	T	C	A	A	G	T	G	C	A	T	A	A	G	G	T	T
RY03	A	A	G	A	T	A	T	T	C	T	A	T	A	A	A	G	A	A	T	C	A	C	A	T	A	C	T	T	G	G	A	T	A	T	C	A	A	G	T	G	C	A	T	A	A	G	G	T	T
RY04	A	A	G	A	T	A	T	T	C	T	A	T	A	A	A	G	A	A	T	C	A	C	A	T	A	C	T	T	G	G	A	T	A	T	C	A	A	G	T	G	C	A	T	A	A	G	G	T	T
RY05	A	A	G	A	T	A	T	T	C	T	A	T	A	A	A	G	A	A	T	C	A	C	A	T	A	C	T	T	G	G	A	T	A	T	C	A	A	G	T	G	C	A	T	A	A	G	G	T	T
RY06	A	A	G	A	T	A	T	T	C	T	A	T	A	A	A	G	A	A	T	C	A	C	A	T	A	C	T	T	G	G	A	T	A	T	C	A	A	G	T	G	C	A	T	A	A	G	G	T	T
RY07	A	A	G	A	T	A	T	T	C	T	A	T	A	A	A	G	A	A	T	C	A	C	A	T	A	C	T	T	G	G	A	T	A	T	C	A	A	G	T	G	C	A	T	A	A	G	G	T	T
RY09	A	A	G	A	T	A	T	T	C	T	A	T	A	A	A	G	A	A	T	C	A	C	A	T	A	C	T	T	G	G	A	T	A	T	C	A	A	G	T	G	C	A	T	A	A	G	G	T	T
RY11	A	A	G	A	T	A	T	T	C	T	A	T	A	A	A	G	A	A	T	C	A	C	A	T	A	C	T	T	G	G	A	T	A	T	C	A	A	G	T	G	C	A	T	A	A	G	G	T	T
RY14	A	A	G	A	T	A	T	T	C	T	A	T	A	A	A	G	A	A	T	C	A	C	A	T	A	C	T	T	G	G	A	T	A	T	C	A	A	G	T	G	C	A	T	A	A	G	G	T	T
RY15	A	A	G	A	T	A	T	T	C	T	A	T	A	A	A	G	A	A	T	C	A	C	A	T	A	C	T	T	G	G	A	T	A	T	C	A	A	G	T	G	C	A	T	A	A	G	G	T	T
RY17	A	A	G	A	T	A	T	T	C	T	A	T	A	A	A	G	A	A	T	C	A	C	A	T	A	C	T	T	G	G	A	T	A	T	C	A	A	G	T	G	C	A	T	A	A	G	G	T	T
PG121	A	A	G	A	T	A	T	T	C	T	A	T	A	A	A	G	A	A	T	C	A	C	A	T	A	C	T	T	G	G	A	T	A	T	C	A	A	G	T	G	C	A	T	A	A	G	G	T	T
PG122	A	A	G	A	T	A	T	T	C	T	A	T	A	A	A	G	A	A	T	C	A	C	A	T	A	C	T	T	G	G	A	T	A	T	C	A	A	G	T	G	C	A	T	A	A	G	G	T	T
PG124	A	A	G	A	T	A	T	T	C	T	A	T	A	A	A	G	A	A	T	C	A	C	A	T	A	C	T	T	G	G	A	T	A	T	C	A	A	G	T	G	C	A	T	A	A	G	G	T	T
PG125	A	A	G	A	T	A	T	T	C	T	A	T	A	A	A	G	A	A	T	C	A	C	A	T	A	C	T	T	G	G	A	T	A	T	C	A	A	G	T	G	C	A	T	A	A	G	G	T	T
PG126	A	A	G	A	T	A	T	T	C	T	A	T	A	A	A	G	A	A	T	C	A	C	A	T	A	C	T	T	G	G	A	T	A	T	C	A	A	G	T	G	C	A	T	A	A	G	G	T	T
PG127	A	A	G	A	T	A	T	T	C	T	A	T	A	A	A	G	A	A	T	C	A	C	A	T	A	C	T	T	G	G	A	T	A	T	C	A	A	G	T	G	C	A	T	A	A	G	G	T	T
PG128	A	A	G	A	T	A	T	T	C	T	A	T	A	A	A	G	A	A	T	C	A	C	A	T	A	C	T	T	G	G	A	T	A	T	C	A	A	G	T	G	C	A	T	A	A	G	G	T	T
PG129	A	A	G	A	T	A	T	T	C	T	A	T	A	A	A	G	A	A	T	C	A	C	A	T	A	C	T	T	G	G	A	T	A	T	C	A	A	G	T	G	C	A	T	A	A	G	G	T	T
PG130	A	A	G	A	T	A	T	T	C	T	A	T	A	A	A	G	A	A	T	C	A	C	A	T	A	C	T	T	G	G	A	T	A	T	C	A	A	G	T	G	C	A	T	A	A	G	G	T	T
PG131	A	A	G	A	T	A	T	T	C	T	A	T	A	A	A	G	A	A	T	C	A	C	A	T	A	C	T	T	G	G	A	T	A	T	C	A	A	G	T	G	C	A	T	A	A	G	G	T	T
PG132	A	A	G	A	T	A	T	T	C	T	A	T	A	A	A	G	A	A	T	C	A	C	A	T	A	C	T	T	G	G	A	T	A	T	C	A	A	G	T	G	C	A	T	A	A	G	G	T	T
PG133	A	A	G	A	T	A	T	T	C	T	A	T	A	A	A	G	A	A	T	C	A	C	A	T	A	C	T	T	G	G	A	T	A	T	C	A	A	G	T	G	C	A	T	A	A	G	G	T	T
PE333	A	A	G	A	T	A	T	T	C	T	A	T	A	A	A	G	A	A	T	C	A	C	A	T	A	C	T	T	G	G	A	T	A	T	C	A	A	G	T	G	C	A	T	A	A	G	G	T	T
PE334	A	A	G	A	T	A	T	T	C	T	A	T	A	A	A	G	A	A	T	C	A	C	A	T	A	C	T	T	G	G	A	T	A	T	C	A	A	G	T	G	C	A	T	A	A	G	G	T	T
PE335	A	A	G	A	T	A	T	T	C	T	A	T	A	A	A	G	A	A	T	C	A	C	A	T	A	C	T	T	G	G	A	T	A	T	C	A	A	G	T	G	C	A	T	A	A	G	G	T	T
PE336	A	A	G	A	T	A	T	T	C	T	A	T	A	A	A	G	A	A	T	C	A	C	A	T	A	C	T	T	G	G	A	T	A	T	C	A	A	G	T	G	C	A	T	A	A	G	G	T	T
PE337	A	A	G	A	T	A	T	T	C	T	A	T	A	A	A	G	A	A	T	C	A	C	A	T	A	C	T	T	G	G	A	T	A	T	C	A	A	G	T	G	C	A	T	A	A	G	G	T	T
PE338	A	A	G	A	T	A	T	T	C	T	A	T	A	A	A	G	A	A	T	C	A	C	A	T	A	C	T	T	G	G	A	T	A	T	C	A	A	G	T	G	C	A	T	A	A	G	G	T	T
PE339	A	A	G	A	T	A	T	T	C	T	A	T	A	A	A	G	A	A	T	C	A	C	A	T	A	C	T	T	G	G	A	T	A	T	C	A	A	G	T	G	C	A	T	A	A	G	G	T	T
PE340	A	A	G	A	T	A	T	T	C	T	A	T	A	A	A	G	A	A	T	C	A	C	A	T	A	C	T	T	G	G	A	T	A	T	C	A	A	G	T	G	C	A	T	A	A	G	G	T	T
PE341	A	A	G	A	T	A	T	T	C	T	A	T	A	A	A	G	A	A	T	C	A	C	A	T	A	C	T	T	G	G	A	T	A	T	C	A	A	G	T	G	C	A	T	A	A	G	G	T	T
PE342	A	A	G	A	T	A	T	T	C	T	A	T	A	A	A	G	A	A	T	C	A	C	A	T	A	C	T	T	G	G	A	T	A	T	C	A	A	G	T	G	C	A	T	A	A	G	G	T	T
PE343	A	A	G	A	T	A	T	T	C	T	A	T	A	A	A	G	A	A	T	C	A	C	A	T	A	C	T	T	G	G	A	T	A	T	C	A	A	G	T	G	C	A	T	A	A	G	G	T	T
PE344	A	A	G	A	T	A	T	T	C	T	A	T	A	A	A	G	A	A	T	C	A	C	A	T	A	C	T	T	G	G	A	T	A	T	C	A	A	G	T	G	C	A	T	A	A	G	G	T	T
TN01	A	A	G	A	T	A	T	T	C	T	A	T	A	A	A	G	A	A	T	C	A	C	A	T	A	C	T	T	G	G	A	T	A	T	C	A	A	G	T	G	C	A	T	A	A	G	G	T	T
TN02	A	A	G	A	T	A	T	T	C	T	A	T	A	A	A	G	A	A	T	C	A	C	A	T	A	C	T	T	G	G	A	T	A	T	C	A	A	G	T	G	C	A	T	A	A	G	G	T	T
TN03	A	A	G	A	T	A	T	T	C	T	A	T	A	A	A	G	A	A	T	C	A	C	A	T	A	C	T	T	G	G	A	T	A	T	C	A	A	G	T	G	C	A	T	A	A	G	G	T	T
TN04	A	A	G	A	T	A	T	T	C	T	A	T	A	A	A	G	A	A	T	C	A	C	A	T	A	C	T	T	G	G	A	T	A	T	C	A	A	G	T	G	C	A	T	A	A	G	G	T	T
TN05	A	A	G	A	T	A	T	T	C	T	A	T	A	A	A	G	A	A	T	C	A	C	A	T	A	C	T	T	G	G	A	T	A	T	C	A	A	G	T	G	C	A	T	A	A	G	G	T	T
TN06	A	A	G	A	T	A	T	T	C	T	A	T	A	A	A	G	A	A	T	C	A	C	A	T	A	C	T	T	G	G	A	T	A	T	C	A	A	G	T	G	C	A	T	A	A	G	G	T	T
TN07	A	A	G	A	T	A	T	T	C	T	A	T	A	A	A	G	A	A	T	C	A	C	A	T	A	C	T	T	G	G	A	T	A	T	C	A	A	G	T	G	C	A	T	A	A	G	G	T	T
TN08	A	A	G	A	T	A	T	T	C	T	A	T	A	A	A	G	A	A	T	C	A	C	A	T	A	C	T	T	G	G	A	T	A	T	C	A	A	G	T	G	C	A	T	A	A	G	G	T	T
TN09	A	A	G	A	T	A	T	T	C	T	A	T	A	A	A	G	A	A	T	C	A	C	A	T	A	C	T	T	G	G	A	T	A	T	C	A	A	G	T	G	C	A	T	A	A	G	G	T	T
TN10	A	A	G	A	T	A	T	T	C	T	A	T	A	A	A	G	A	A	T	C	A	C	A	T	A	C	T	T	G	G	A	T	A	T	C	A	A	G	T	G	C	A	T	A	A	G	G	T	T
TN11	A	A	G	A	T	A	T	T	C	T	A	T	A	A	A	G	A	A	T	C	A	C	A	T	A	C	T	T	G	G	A	T	A	T	C	A	A	G	T	G	C	A	T	A	A	G	G	T	T
TN12	A	A	G	A	T	A	T	T	C	T	A	T	A	A	A	G	A	A	T	C	A	C	A	T	A	C	T	T	G	G	A	T	A	T	C	A	A	G	T	G	C	A	T	A	A	G	G	T	T
[truncated: 5,000 more columns]

## Sheet: Table S3
Table S3. Haplotype and nucleotide diversity and number of synonymous and non-synonymous substitutions per river.
	N	Haplotypes	No. of polymorphic sites	Syn substitutions	Non syn substitutions	Haplotype Diversity	Standard Deviation	Nucleotide Diversity	Standard Deviation
Ason	12	3	8	2	6	0.53	0.136	0.00041	0.00011
Allier (Loire)	12	6	21	6	15	0.864	0.072	0.00136	0.00019
Elorn	12	6	12	4	8	0.818	0.096	0.00057	0.0001
Teign	6	5	26	8	18	0.933	0.122	0.00144	0.00039
Taw	12	6	12	4	8	1	0.096	0.00072	0.00011
Blackwater	12	8	16	6	10	0.924	0.057	0.00066	7e-05
Conwy	12	7	11	4	7	0.879	0.075	0.00052	6e-05
Dacre Beck	12	5	9	5	4	0.788	0.09	0.00043	6e-05
Stimchar	12	6	11	6	5	0.879	0.06	0.0006	5e-05
Feochan	12	8	15	5	10	0.924	0.057	0.00067	9e-05
Orchy	12	7	15	6	9	0.894	0.063	0.00072	6e-05
Laxford	12	7	15	5	10	0.909	0.056	0.00073	0.0001
North Uist	12	5	8	4	4	0.803	0.078	0.00043	7e-05
Oykel	12	8	11	5	6	0.924	0.057	0.00055	6e-05
Ugie	10	4	11	3	8	0.644	0.152	0.00063	0.00014
North Esk	12	8	32	5	27	0.924	0.057	0.0011	0.00021
Tweed	12	7	14	5	9	0.909	0.056	0.00069	8e-05
Hofsa	12	9	13	6	7	0.909	0.079	0.00075	7e-05
Sog	12	4	5	2	3	0.636	0.128	0.00029	5e-05
Bjerkreimselva	11	5	9	3	6	0.818	0.083	0.00054	9e-05
Numedalslagen	12	8	17	8	9	0.924	0.057	0.00073	7e-05
Eiravassdraget	12	7	15	7	8	0.894	0.063	0.00069	8e-05
Komagelva	11	6	20	4	16	0.855	0.085	0.00133	0.00015
Neva (Kymijoki)	12	3	3	0	3	0.712	0.069	0.00019	3e-05
Namsen	12	7	17	9	8	0.879	0.075	0.00078	8e-05
Rynda	12	8	88	13	75	0.924	0.057	0.00449	0.00117
Pongoma	12	3	5	2	3	0.621	0.087	0.00038	4e-05
Pechora	12	3	2	0	2	0.712	0.069	0.00014	2e-05
Teno	12	8	75	12	63	0.939	0.048	0.00324	0.00129
